# Supplementary material for: Effects of additives on the performance of a laser-induced graphene sensor modified with ZrO2 nanoparticles for OP detection
Source: Royal Society of Chemistry journal article supplement (doi:10.1039/d3an01215h), 2023-01-01
Supplement: d3an01215h1.pdf [file d3an01215h1.pdf]

## Supporting information

### **Effects of additives on performance of a laser-induced graphene sensor modified with ZrO<sub>2</sub> particle for OP detection**

Huiyang Xu<sup>1,2</sup>, Chuang Guo<sup>3</sup>, Weijian Yuan<sup>2</sup>, Wenna Zhang<sup>1</sup>, Qiu Sun<sup>1,\*</sup>, Jianfeng Wu<sup>4,\*</sup>, Xuelin Zhang<sup>2,\*</sup>

<sup>1</sup> School of Chemistry and Chemical Engineering, Harbin Institute of Technology, Harbin 150001, China

<sup>2</sup> School of Astronautics, Harbin Institute of Technology, Harbin 150001, China

<sup>3</sup> Beijing Spacecrafts, Beijing, 100194, China

<sup>4</sup> State Key Laboratory of Toxicology and Medical Countermeasures and Laboratory of Toxicant Analysis, Institute of Pharmacology and Toxicology, Academy of Military Medical Sciences, Beijing 100850, China

\*Corresponding Author: [sunqiu@hit.edu.cn](mailto:sunqiu@hit.edu.cn); [ammswjf@hotmail.com](mailto:ammswjf@hotmail.com); [zhangxuelin@hit.edu.cn](mailto:zhangxuelin@hit.edu.cn)

## Supporting Equations

### Equation S1

Randles-Sevcik:<sup>1</sup>

$$I_p = 2.69 \times 10^5 n^{\frac{3}{2}} A D_0^{\frac{1}{2}} \nu^{\frac{1}{2}} C ; \quad (1-1)$$

Where  $I_p$  is the peak current (A),  $n$  is the number of electrons transferred during the redox process,  $A$  is the electroactive area of the electrode (cm<sup>2</sup>),  $D_0$  is the diffusion coefficient ( $6.73 \times 10^{-6}$  cm<sup>2</sup> s<sup>-1</sup>), and  $C$  is the concentration of the probe in solution ( $5 \times 10^{-6}$  cm<sup>3</sup>). From this equation the surface active area is calculated to a bare LIG electrode of 0.100 cm<sup>2</sup> and the surface active area of 0.0286 cm<sup>2</sup> for a bare GCE electrode.

### Equations S2

Nicholson's:<sup>2</sup>

The kinetic parameter ( $\Psi$ ) of infinite order can be calculated using the following equation, whose value depends on the peak potential separation  $\Delta E_p$ .

$$\Psi = k^0 \left( \frac{D_0}{D_r} \right)^{\frac{\alpha}{2}} \left( \frac{RT}{nFD_0\nu\pi} \right)^{\frac{1}{2}} ; \quad (1-2)$$

where  $D_0/D_r$  is the ratio of diffusion coefficient of oxidation and reduction forms of electroactive substances,  $\alpha$  is the transfer coefficient,  $R$  is the molar gas constant ( $8.314$  J K<sup>-1</sup> mol<sup>-1</sup>),  $T$  is the temperature,  $n$  is the number of electrons transferred in the electrochemical reaction,  $\nu$  is the scanning rate (V s<sup>-1</sup>),  $F$  is the Faraday constant ( $96489$  C mol<sup>-1</sup>). Here,  $D_0/D_r$  can be simplified as:

$$\Psi = k^0 \left( \frac{RT}{FD\nu\pi} \right)^{\frac{1}{2}} ; \quad (1-3)$$

Since the reaction is a one-electron transfer process,  $\Psi$  depends on  $\Delta E_p$  and can be calculated by the following formula where  $X$  is equal to  $\Delta E_p^*n$ .

$$\Psi = \frac{-0.6288 + 0.0021X}{1 - 0.017X} ; \quad (1-4)$$

Calculated from the above equations,  $k^0=0.000825$  cm<sup>2</sup> s<sup>-1</sup>.

### Equations S3

Laviron:<sup>3</sup>

The CV curve also conveys the determination of the apparent electron transfer coefficient  $\alpha$  that can be calculated from the Laviron equation for quasi-reversible reactions.

$$E = k + \frac{RT \ln v}{\alpha n F} ; \quad (1-5)$$

where  $R$  is the molar gas constant of  $8.314 \text{ J K}^{-1}$ ,  $T$  was  $298 \text{ K}$ ,  $F$  is the Faraday's constant of  $96485 \text{ C mol}^{-1}$ ,  $k$  is a constant and  $n$  is the number of electrons transferred.

The apparent electron transfer rate constant  $k_s$  can be calculated from the following equation.

$$\lg k_s = \alpha \lg(1 - \alpha) + (1 - \alpha) \lg \alpha - \lg \frac{RT}{nFv} - (1 - \alpha) \alpha \frac{nF\Delta E}{2.303RT} ; \quad (1-6)$$

## Supporting Figures

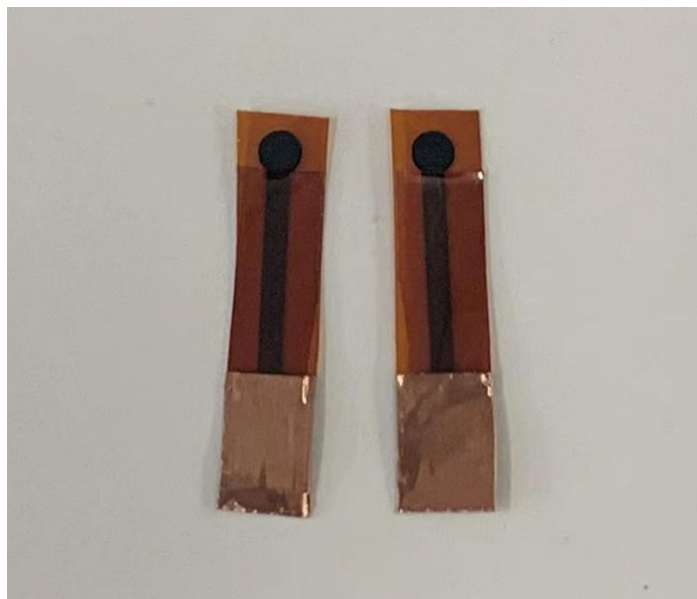

**Fig. S1** Bare LIG electrode.

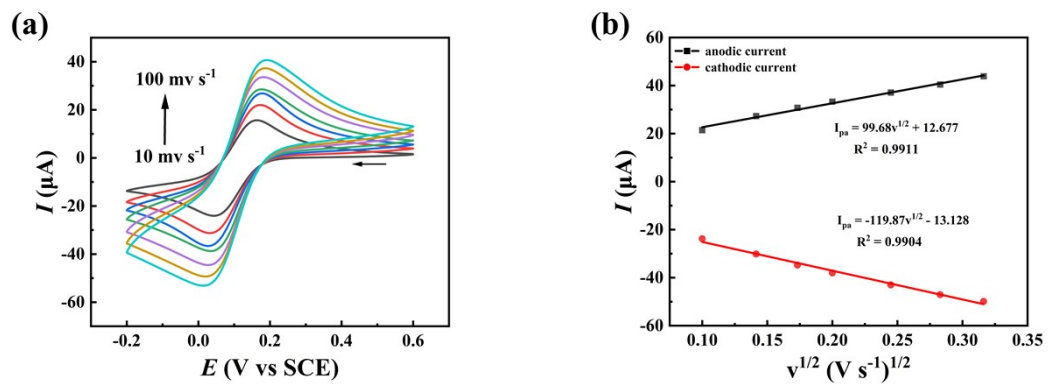

**Fig. S2** CVs of the GCE varying scan rate from 10 to 100  $\text{mV s}^{-1}$  in 0.1 M KCl containing 5 mM  $\text{K}_3[\text{Fe}(\text{CN})_6]$  (a); Linear relationship between  $I_p$  and  $v^{1/2}$  for GCE (b).

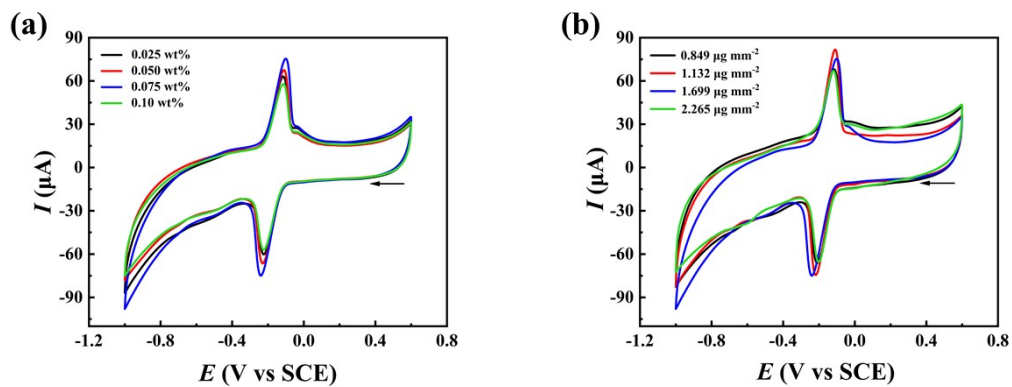

**Fig. S3** CVs of varying concentrations of CS (a); CVs of varying loadings of ZrO<sub>2</sub>NPs with CS as binder (b) in 0.1 M PBS (pH=7.4) containing 2.5 μg ml<sup>-1</sup> MP at the scan rate of 0.1 V s<sup>-1</sup>.

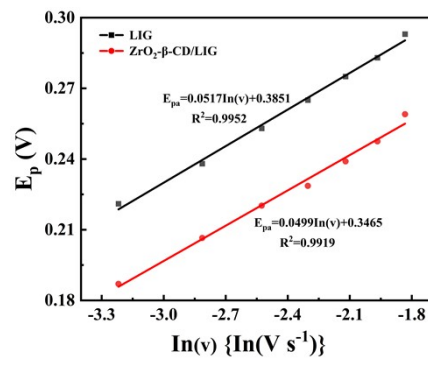

**Fig. S4** Linear relationship between  $E_p$  and  $\ln(v)$  for LIG and ZrO<sub>2</sub>-β-CD/LIG.

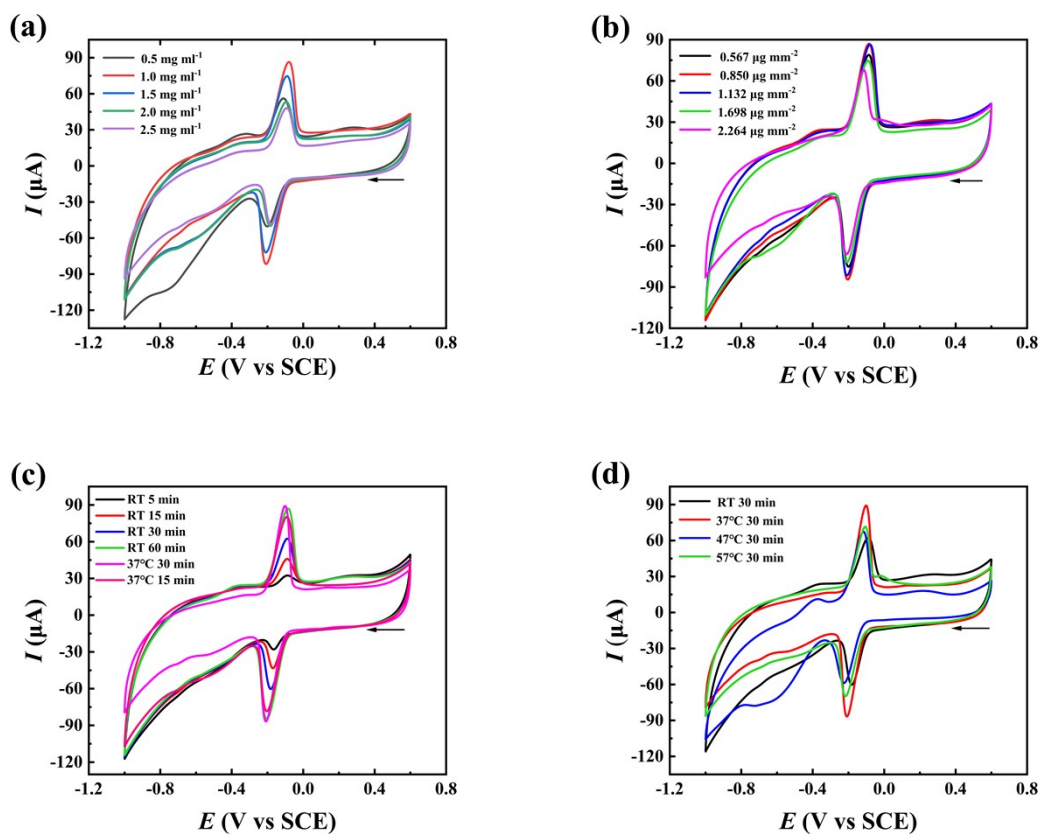

**Fig. S5** CVs of  $\text{ZrO}_2$ - $\beta$ -CD/LIG modified by different  $\beta$ -CD concentrations (a); CVs of  $\text{ZrO}_2$ - $\beta$ -CD/LIG modified with different loading amounts of  $\text{ZrO}_2$  (b); CVs of  $\text{ZrO}_2$ - $\beta$ -CD/LIG at various times of adsorption (c); CVs of  $\text{ZrO}_2$ - $\beta$ -CD/LIG at various temperatures in 0.1 M PBS (pH=7.4) containing 2.5  $\mu\text{g ml}^{-1}$  MP at the scan rate of 0.1  $\text{V s}^{-1}$  (d).



## References

1. K. D. Caetano, D. S. da Rosa, T. M. Pizzolato, P. A. M. dos Santos, R. Hinrichs, E. V. Benvenuti, S. L. P. Dias, L. T. Arenas and T. M. H. Costa, *Micropor Mesopor Mat*, 2020, **309**.
2. I. Lavagnini, R. Antiochia and F. Magno, *Electroanalysis*, 2004, **16**, 505-506.
3. S. Sain, S. Roy, A. Mathur, V. M. Rajesh, D. Banerjee, B. Sarkar and S. S. Roy, *ACS Applied Nano Materials*, 2022, **5**, 17516-17525.
